# Supplementary material for: Physicochemical and Photocatalytic Properties under Visible Light of ZnO-Bentonite/Chitosan Hybrid-Biocompositefor Water Remediation
Source: MDPI journal article supplement (doi:10.3390/nano12010102), 2021-12-29
Supplement: s1 [file s1]

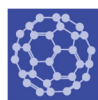

# Physicochemical and Photocatalytic Properties under Visible Light of ZnO-Bentonite/Chitosan Hybrid-Biocomposite for Water Remediation

Imane Aadnan <sup>1</sup>, Omar Zegaoui <sup>1,\*</sup>, Abderrahim El Mragui <sup>1</sup> and Joaquim Carlos Gomes Esteves da Silva <sup>2</sup>

<sup>1</sup> Research team “Materials and Applied Catalysis: MCA”, CBAE Laboratory, URL-CNRST N°13, Faculty of Sciences, Moulay Ismail University of Meknes, Zitoune, Meknès BP. 11201, Morocco; i.aadnan@edu.umi.ac.ma (I.A.); a.elmragui@edu.umi.ac.ma (A.E.M.)

<sup>2</sup> (UP)—Research Center in Chemistry, DGAOT, Faculty of Sciences, University of Porto, Rua do Campo Alegre, s/n, 4169-007 Porto, Portugal; jcsilva@fc.up.pt

\* Correspondence: o.zegaoui@umi.ac.ma

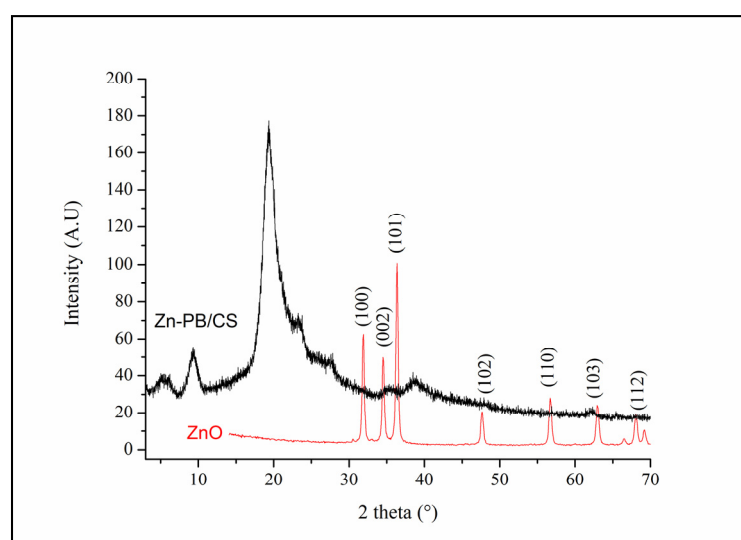

Figure S1. XRD patterns of ZnO and Zn-PB/CS materials.

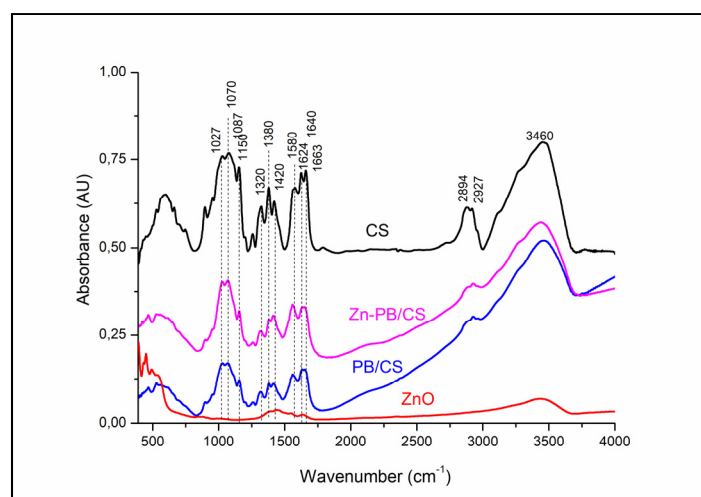

Figure S2. FTIR spectra of CS, PB/CS, ZnO and Zn-PB/CS biocomposites.

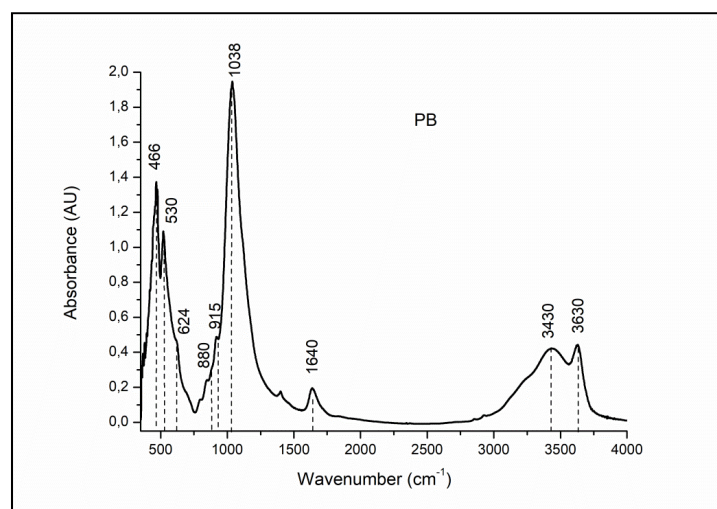

Figure S3. FTIR spectrum of PB sample.

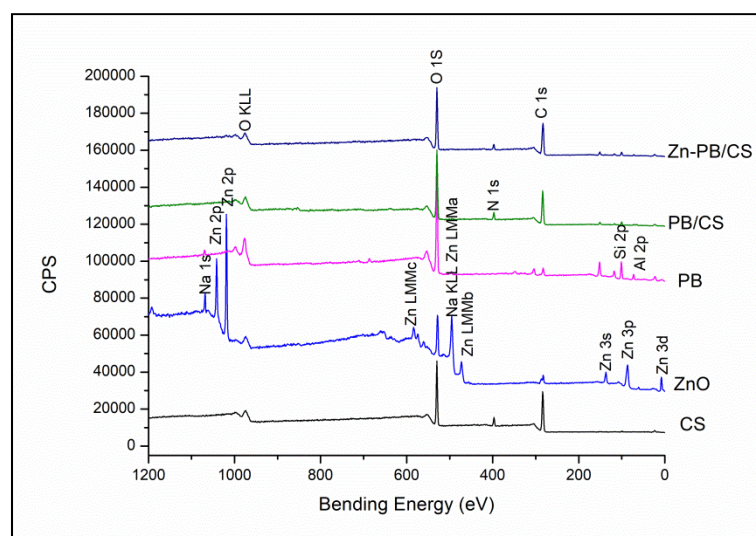

Figure S4. Full scan XPS spectra of the hybrid-biocomposites accompanied with those of PB, ZnO and CS.

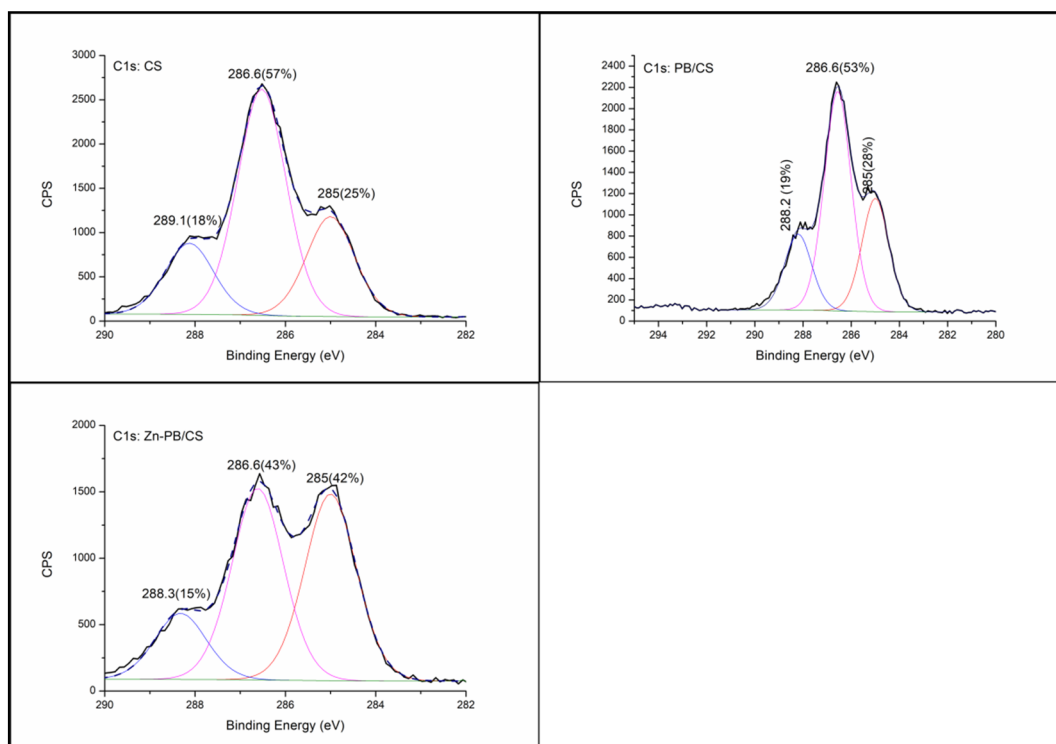

Figure S5. High-resolution XPS spectra of C1s.

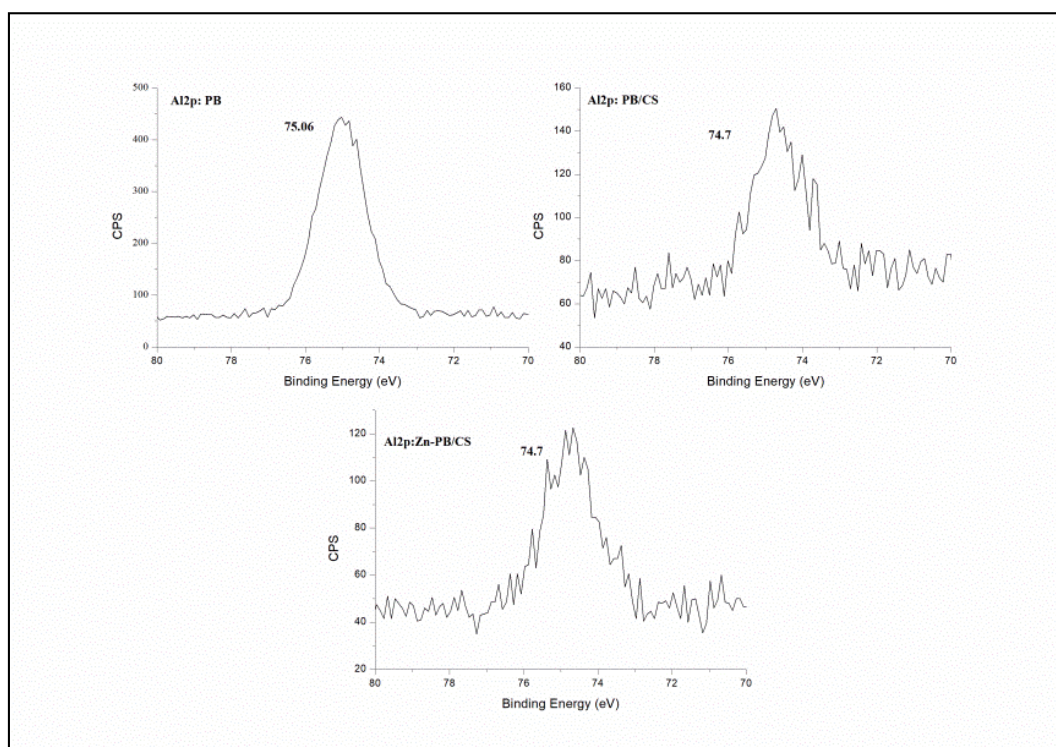

Figure S6. High-resolution XPS spectra of Al2p.

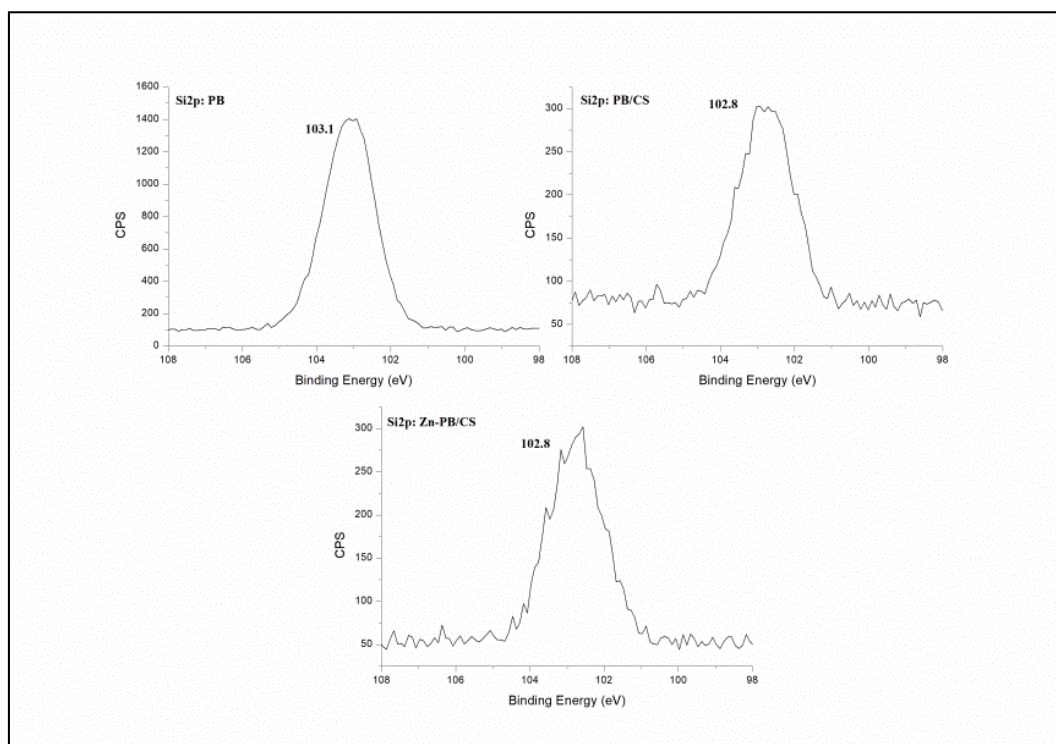

**Figure S7.** High-resolution XPS spectra of Si2p.

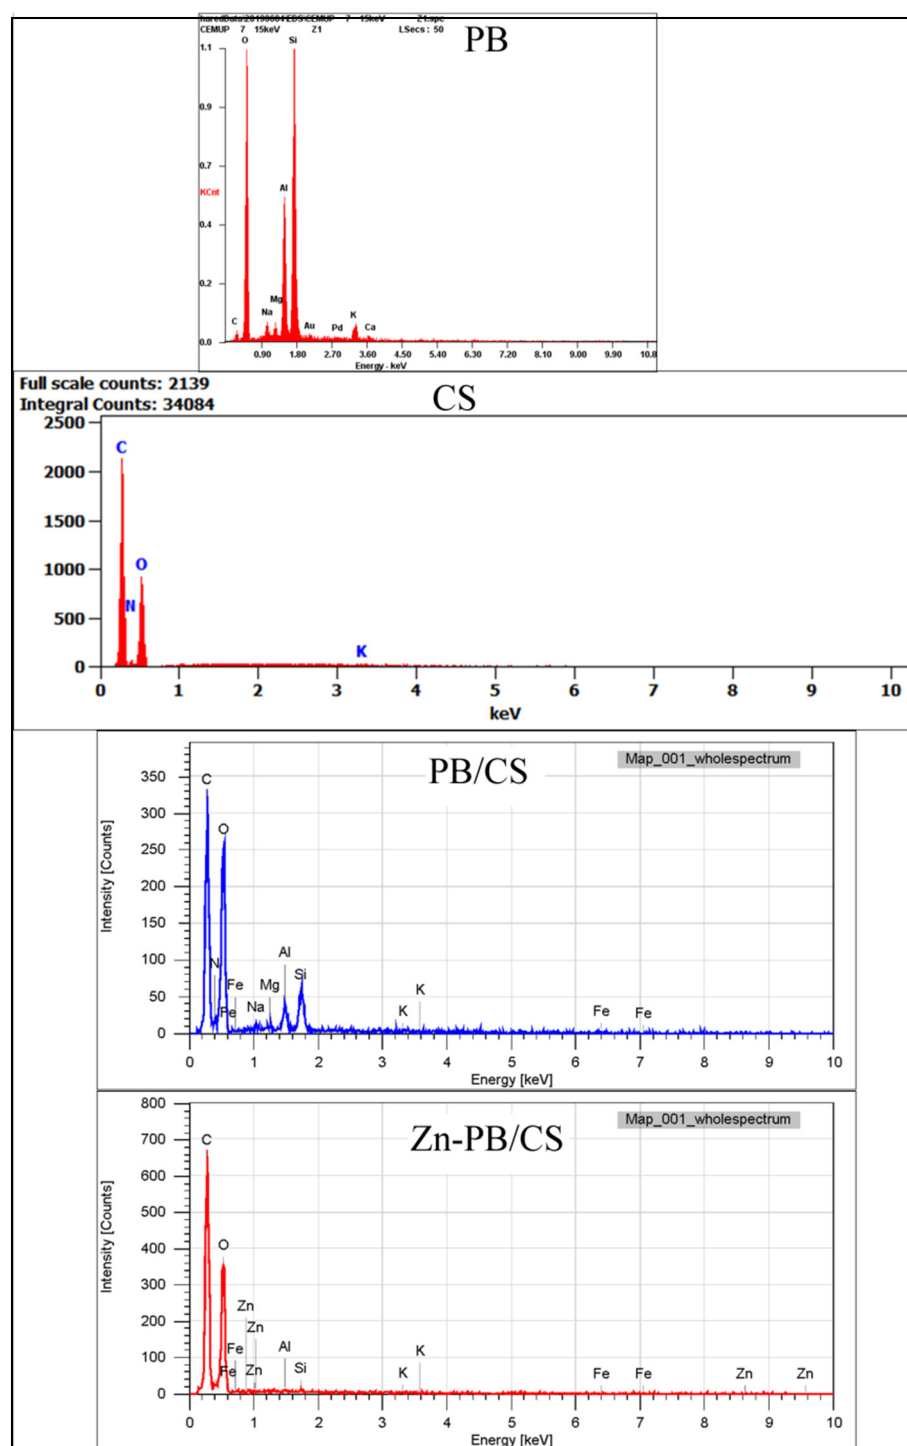

Figure S8. EDS analyses of PB, CS, PB/CS and Zn-PB/CS samples.

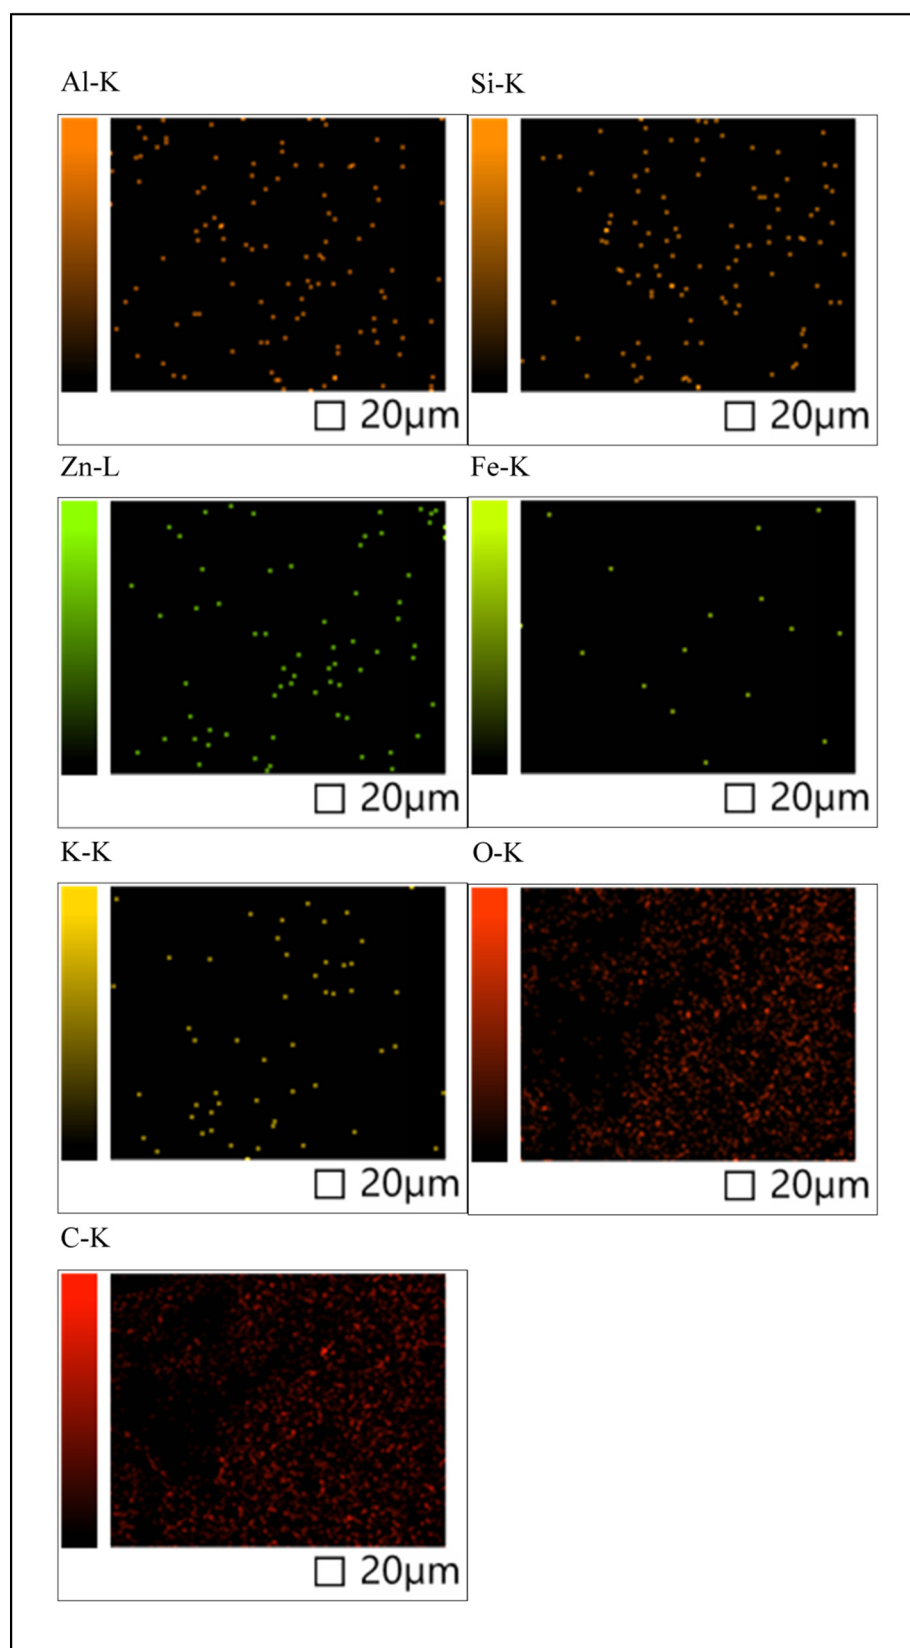

**Figure S9.** EDS mapping analysis of Zn-PB/CS hybrid-biocomposite.
